# Supplementary material
Source: PubMed Central journal article supplement (PMC7185864)
Supplement: mmc1.pdf [file mmc1.pdf]

## Supplementary webappendix

This webappendix formed part of the original submission and has been peer reviewed. We post it as supplied by the authors.

Supplement to: Müller M, Meyer B, Corman VM, et al. Presence of Middle East respiratory syndrome coronavirus antibodies in Saudi Arabia: a nationwide, cross-sectional, serological study. *Lancet Infect Dis* 2015; published online April 9. [http://dx.doi.org/10.1016/S1473-3099\(15\)70090-3](http://dx.doi.org/10.1016/S1473-3099(15)70090-3).

## Supplementary Data

**Supplementary Table S1. Socio-demographic characteristics of the normal population sample**

| <b>Normal population KSA</b> |                   |                         |                   |
|------------------------------|-------------------|-------------------------|-------------------|
| <b>Characteristic</b>        | <b>Categories</b> | <b>Total samples N*</b> | <b>Percentage</b> |
| <b>Gender</b>                | Male              | 4,341                   | 49.79             |
|                              | Female            | 4,378                   | 50.21             |
| <b>Age</b>                   | 15 – 24           | 1,711                   | 19.6              |
|                              | 25 – 34           | 2,594                   | 29.8              |
|                              | 35 – 44           | 2,115                   | 24.3              |
|                              | 45 – 54           | 1,225                   | 14.0              |
|                              | 55 – 64           | 518                     | 5.9               |
|                              | 65+               | 556                     | 6.4               |
| <b>Total</b>                 |                   | <b>8,719*</b>           |                   |

\*For 1,290 of 10,009 (12.89%) serum samples reliable information on gender and age could not be retrieved

**Supplementary Table S2. Detailed information on 22 stage 2 MERS-CoV antibody positive human serum samples**

| Subject | Study           | Province | Occupation  | Gender | Age | Sampling time point | rELISA | rIFA (IgG)   | rIFA (IgM) | PRNT50 | PRNT90 |
|---------|-----------------|----------|-------------|--------|-----|---------------------|--------|--------------|------------|--------|--------|
| 1       | Health centre   | Najran   | NK*         | Male   | 18  | May 2013            | pos.   | pos.         | neg.       | 40     | <20    |
| 2       | Health centre   | Hail     | NK          | Male   | 23  | June 2013           | pos.   | pos.         | neg.       | 160    | 40     |
| 3       | Health centre   | Qasim    | NK          | Male   | 30  | May 2013            | pos.   | pos.         | neg.       | 160    | 40     |
| 4       | Health centre   | Riyadh   | NK          | Male   | 37  | May 2013            | pos.   | pos.         | neg.       | 160    | 40     |
| 5       | Health centre   | Riyadh   | NK          | Female | 44  | May 2013            | pos.   | pos.         | neg.       | 40     | 20     |
| 6       | Health centre   | Madinah  | NK          | Male   | 47  | April 2013          | pos.   | pos.         | neg.       | 80     | <20    |
| 7       | Health centre   | Riyadh   | NK          | Male   | NK  | NK                  | pos.   | pos.         | neg.       | 320    | 160    |
| 8       | National Survey | Riyadh   | NK          | Male   | 50  | April-June 2013     | pos.   | pos.         | neg.       | 40     | 20     |
| 9       | National Survey | Riyadh   | NK          | Male   | 70  | April-June 2013     | pos.   | pos.         | neg.       | 160    | 80     |
| 10      | National Survey | Riyadh   | NK          | NK     | NK  | April-June 2013     | pos.   | pos.         | neg.       | 80     | <20    |
| 11      | National Survey | Riyadh   | NK          | Female | 70  | April-June 2013     | pos.   | pos.         | neg.       | 80     | 20     |
| 12      | National Survey | Najran   | NK          | Male   | 39  | April-June 2013     | pos.   | pos.         | neg.       | 80     | 20     |
| 13      | National Survey | Najran   | NK          | Male   | 50  | April-June 2013     | pos.   | pos.         | neg.       | 320    | 80     |
| 14      | National Survey | Najran   | NK          | NK     | NK  | April-June 2013     | pos.   | pos.         | neg.       | 1,280  | 320    |
| 15      | National Survey | Northern | NK          | Male   | 38  | April-June 2013     | pos.   | pos.         | pos.       | 1,280  | 640    |
| 16      | Slaughterhouse  | Makkah   | Butcher     | Male   | 31  | August 2013         | pos.   | pos.         | neg.       | 80     | 20     |
| 17      | Slaughterhouse  | Makkah   | Housekeeper | Male   | 45  | August 2013         | pos.   | pos.         | neg.       | 80     | 40     |
| 18      | Slaughterhouse  | Makkah   | Butcher     | Male   | 43  | August 2013         | pos.   | pos.         | neg.       | 40     | <20    |
| 19      | Slaughterhouse  | Makkah   | Butcher     | Male   | 41  | August 2013         | pos.   | pos.         | neg.       | 20     | <20    |
| 20      | Slaughterhouse  | Makkah   | Butcher     | Male   | 23  | August 2013         | pos.   | indecisive** | neg.       | 40     | <20    |
| 21      | Shepherd        | Asir     | Shepherd    | Male   | 84  | August 2013         | pos.   | pos.         | neg.       | 20     | <20    |
| 22      | Shepherd        | Eastern  | Shepherd    | Male   | NK  | March 2014          | pos.   | pos.         | neg.       | 160    | 40     |

\*NK= not known

\*\*Serum no. 20 was positive by rELISA and had an indecisive outcome in rIFA. As the serum was rated positive by PRNT<sub>50</sub> the final rating was stage 1 and stage 2 positive.

**Supplementary Table S3. Serosurvey for MERS-CoV antibodies in the general Saudi population with separated cohorts**

| Name                      | Months and Year of sampling | Total N | Stage 1 seropositive<br>N (%)<br>(95% CI) | Stage 2 seropositive<br>N (%)<br>(95% CI) |
|---------------------------|-----------------------------|---------|-------------------------------------------|-------------------------------------------|
| Burden of disease study   | April-June 2013             | 5,765   | 10 (0.17%)<br>(0.09-0.31%)                | 8 (0.14%)<br>(0.06-0.26%)                 |
| Primary health care study | December 2012- December2013 | 4,244   | 7 (0.16%)<br>(0.07-0.33%)<br>p=0.89*      | 7 (0.16%)<br>(0.07-0.33%)<br>p=0.94*      |

\*Chi<sup>2</sup> test with Yates correction two-tail (OpenEpi) in order to compare the results of both subcohorts.

**Supplementary Table S4. Correlation of serological status with age**

| <b>Group</b>                           | <b>Age categories</b> | <b>Total samples N*</b> | <b>Confirmed MERS-CoV infections</b> | <b>Chi<sup>2</sup> test**</b> |
|----------------------------------------|-----------------------|-------------------------|--------------------------------------|-------------------------------|
| <b>General population</b>              | 15 – 24               | 1,711                   | 2                                    | p=0.86                        |
|                                        | 25 – 34               | 2,594                   | 1                                    | p=0.92                        |
|                                        | 35 – 44               | 2,115                   | 4                                    | p=0.81                        |
|                                        | 45 – 54               | 1,225                   | 3                                    | p=0.61                        |
|                                        | 55 – 64               | 518                     | 0                                    | p=0.77                        |
|                                        | 65+                   | 556                     | 2                                    | p=0.46                        |
|                                        | <b>All</b>            | <b>8,719</b>            | <b>12</b>                            |                               |
| <b>Occupationally exposed subjects</b> | 15 – 24               | 21                      | 1                                    | p=0.89                        |
|                                        | 25 – 34               | 73                      | 1                                    | p=0.84                        |
|                                        | 35 – 44               | 81                      | 2                                    | p=0.76                        |
|                                        | 45 – 54               | 35                      | 1                                    | p=0.62                        |
|                                        | 55 – 64               | 10                      | 0                                    | p=0.62                        |
|                                        | 65+                   | 4                       | 1                                    | p=0.27                        |
|                                        | <b>All</b>            | <b>224</b>              | <b>6</b>                             |                               |

\*Only individuals with recorded age information

\*\*Proportion of cases in age category vs. proportion of cases in whole group

**Supplementary Table S5. Geographic distribution of MERS-CoV antibody-positive individuals**

| Province       | Population*       | No. MERS-CoV positive/tested (%) |                         |                         |
|----------------|-------------------|----------------------------------|-------------------------|-------------------------|
|                |                   | rELISA                           | Stage 1                 | Stage 2                 |
| Al-Jouf        | 483,100           | 5/382 (1.31)                     | 0/382 (0.0)             | 0/382 (0.0)             |
| Asir           | 2,095,900         | 19/1,022 (1.66)                  | 0/1,022 (0.0)           | 0/1,022 (0.0)           |
| Baha           | 450,700           | 6/375 (1.60)                     | 0/375 (0.0)             | 0/375 (0.0)             |
| Eastern        | 4,533,800         | 14/931(1.50)                     | 0/931 (0.0)             | 0/931 (0.0)             |
| Hail           | 654,700           | 7/343(1.75)                      | 1/343 (0.29)            | 1/343 (0.29)            |
| Jizan          | 1,497,400         | 10/774 (1.29)                    | 0/774 (0.0)             | 0/774 (0.0)             |
| Madinah        | 1,962,600         | 7/545 (1.28)                     | 1/545 (0.18)            | 1/545 (0.18)            |
| Makkah         | 7,688,600         | 19/1,513 (1.26)                  | 1/1,513 (0.07)          | 0/1,514 (0.0)           |
| Najran         | 555,100           | 9/539 (1.67)                     | 5/539 (0.93)            | 4/539 (0.74)            |
| Northern       | 351,000           | 8/321 (2.49)                     | 1/321 (0.31)            | 1/321 (0.31)            |
| Qasim          | 1,337,600         | 10/529 (1.89)                    | 1/529 (0.19)            | 1/529 (0.19)            |
| Riyadh         | 7,517,000         | 34/2,343 (1.45)                  | 7/2,343 (0.30)          | 7/2,343 (0.30)          |
| Tabouk         | 866,800           | 7/392 (1.79)                     | 0/392 (0.0)             | 0/392 (0.0)             |
| <b>Total N</b> | <b>29,994,300</b> | <b>152/10,009 (1.52)</b>         | <b>17/10,009 (0.17)</b> | <b>15/10,009 (0.15)</b> |

\*KSA population census (year 2013) was retrieved from the Saudi Arabia Central Department of Statistics & Information.
